# Supplementary material
Source: publisher figshare collection journal article supplement (https://gsajournals.figshare.com/articles/dataset/_/12885599)

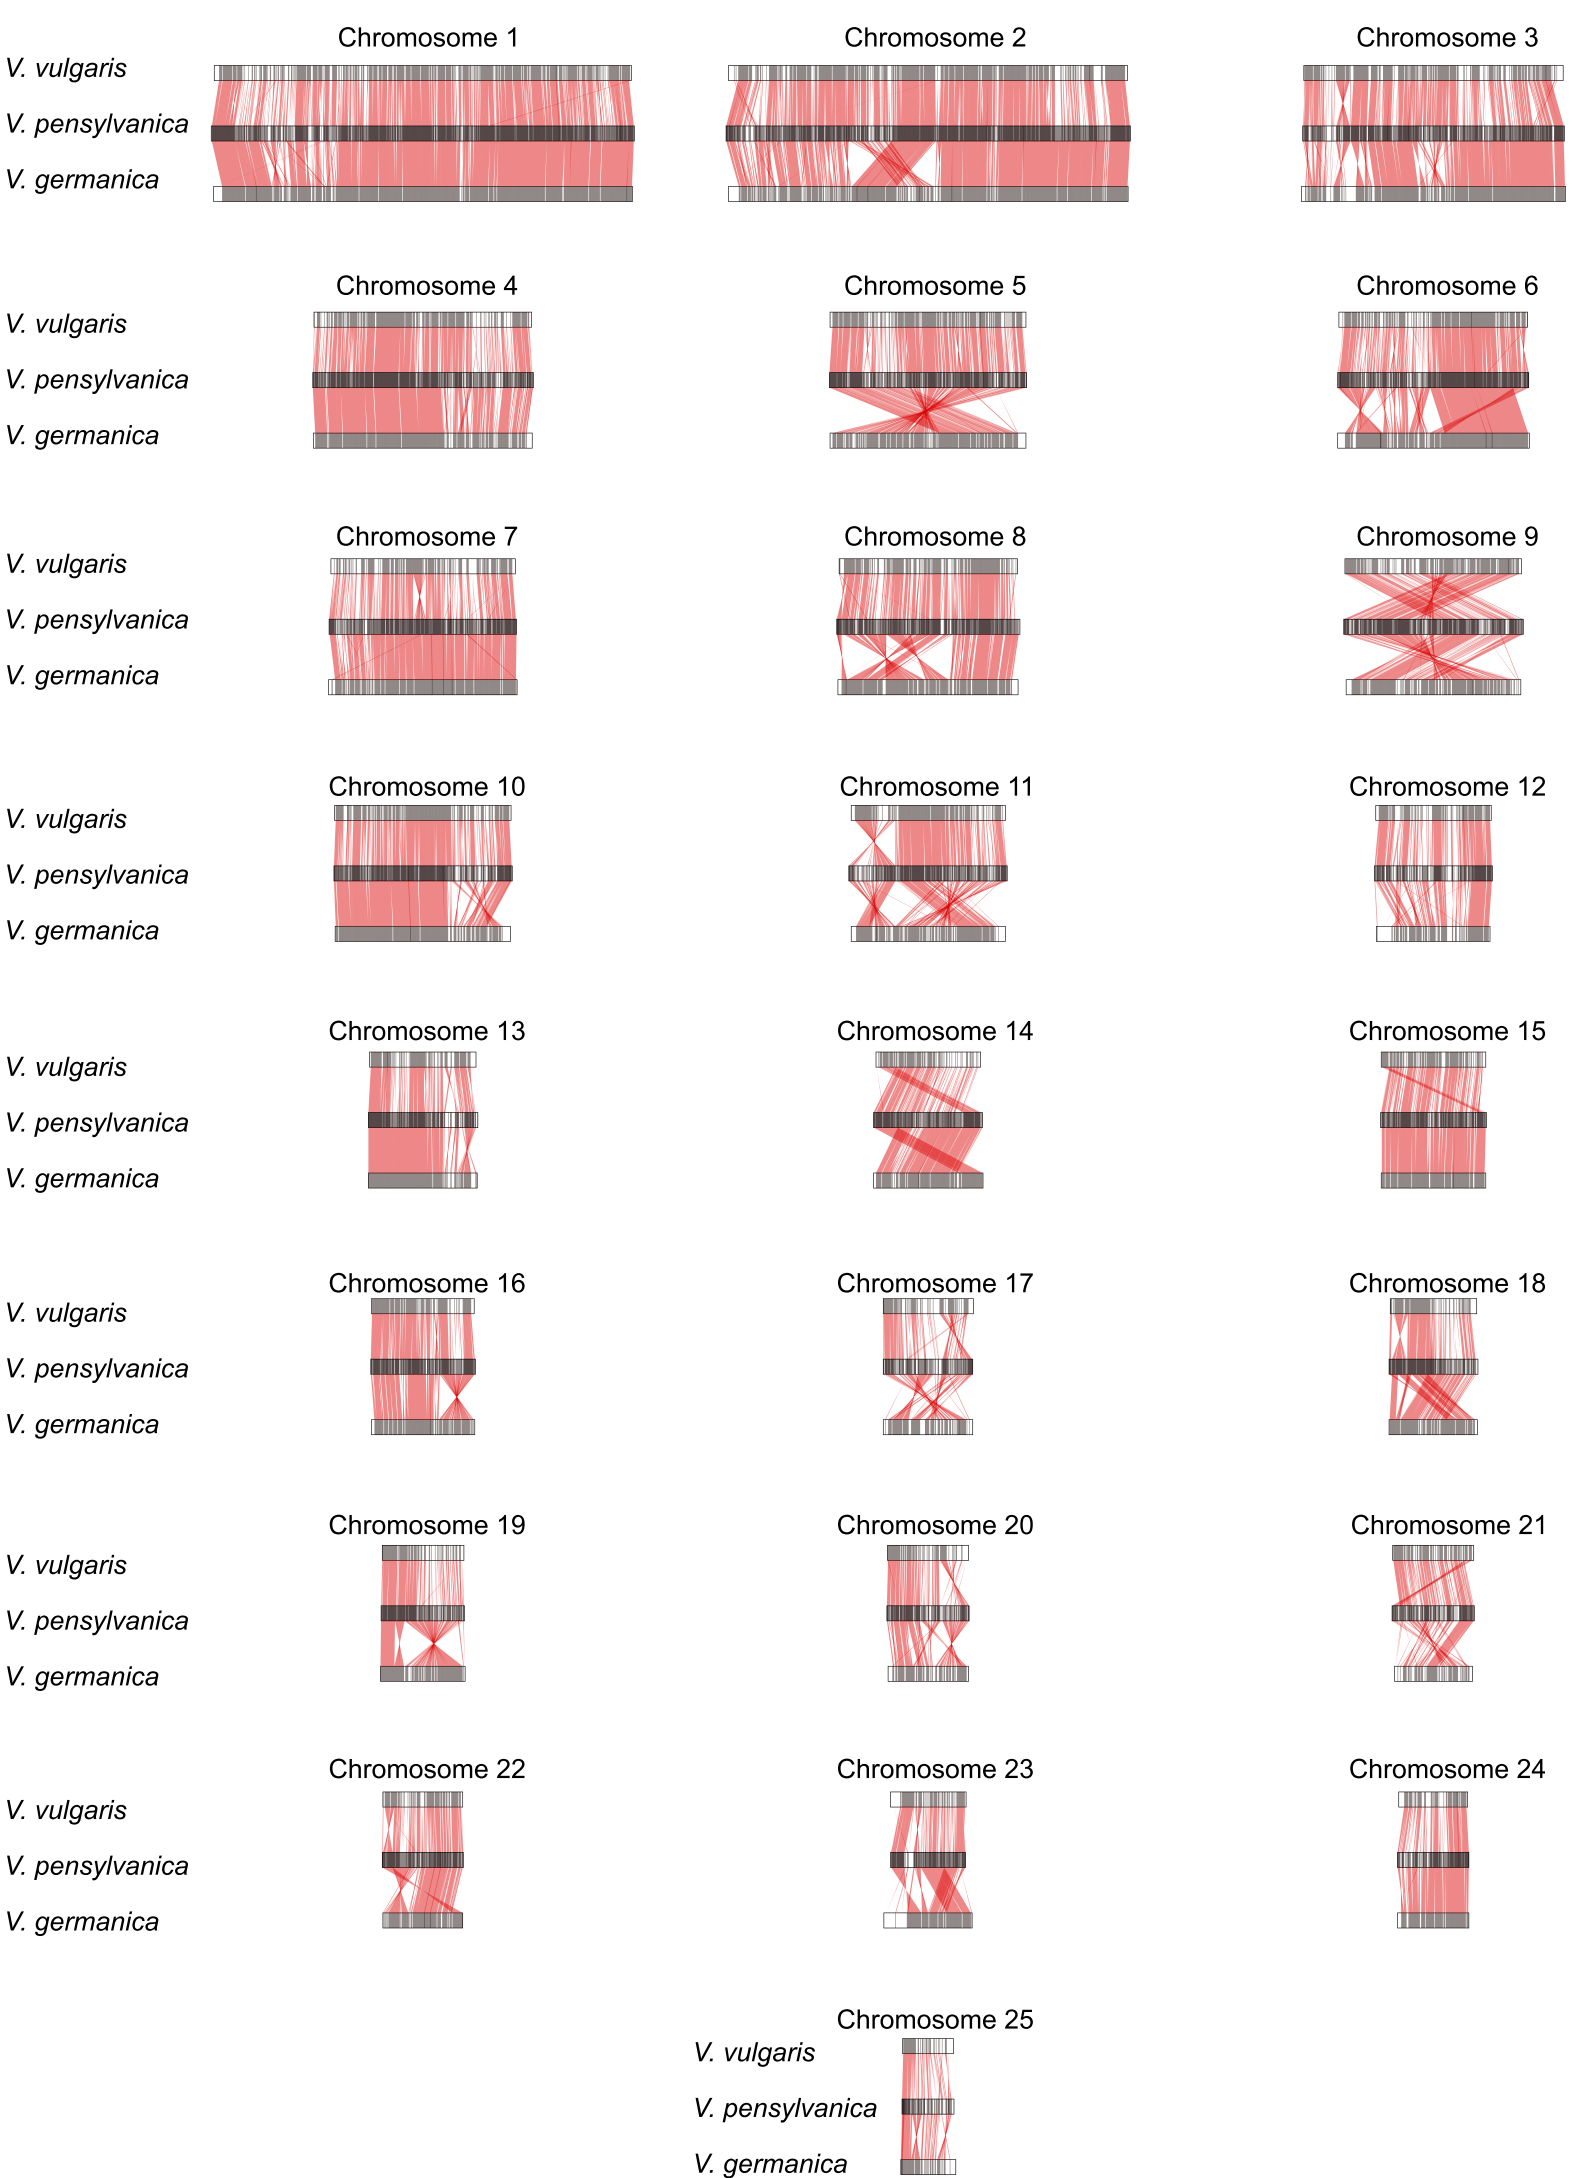

Supplement: Supplementary file 4 [file 1]

Tree scale: 0.1

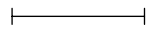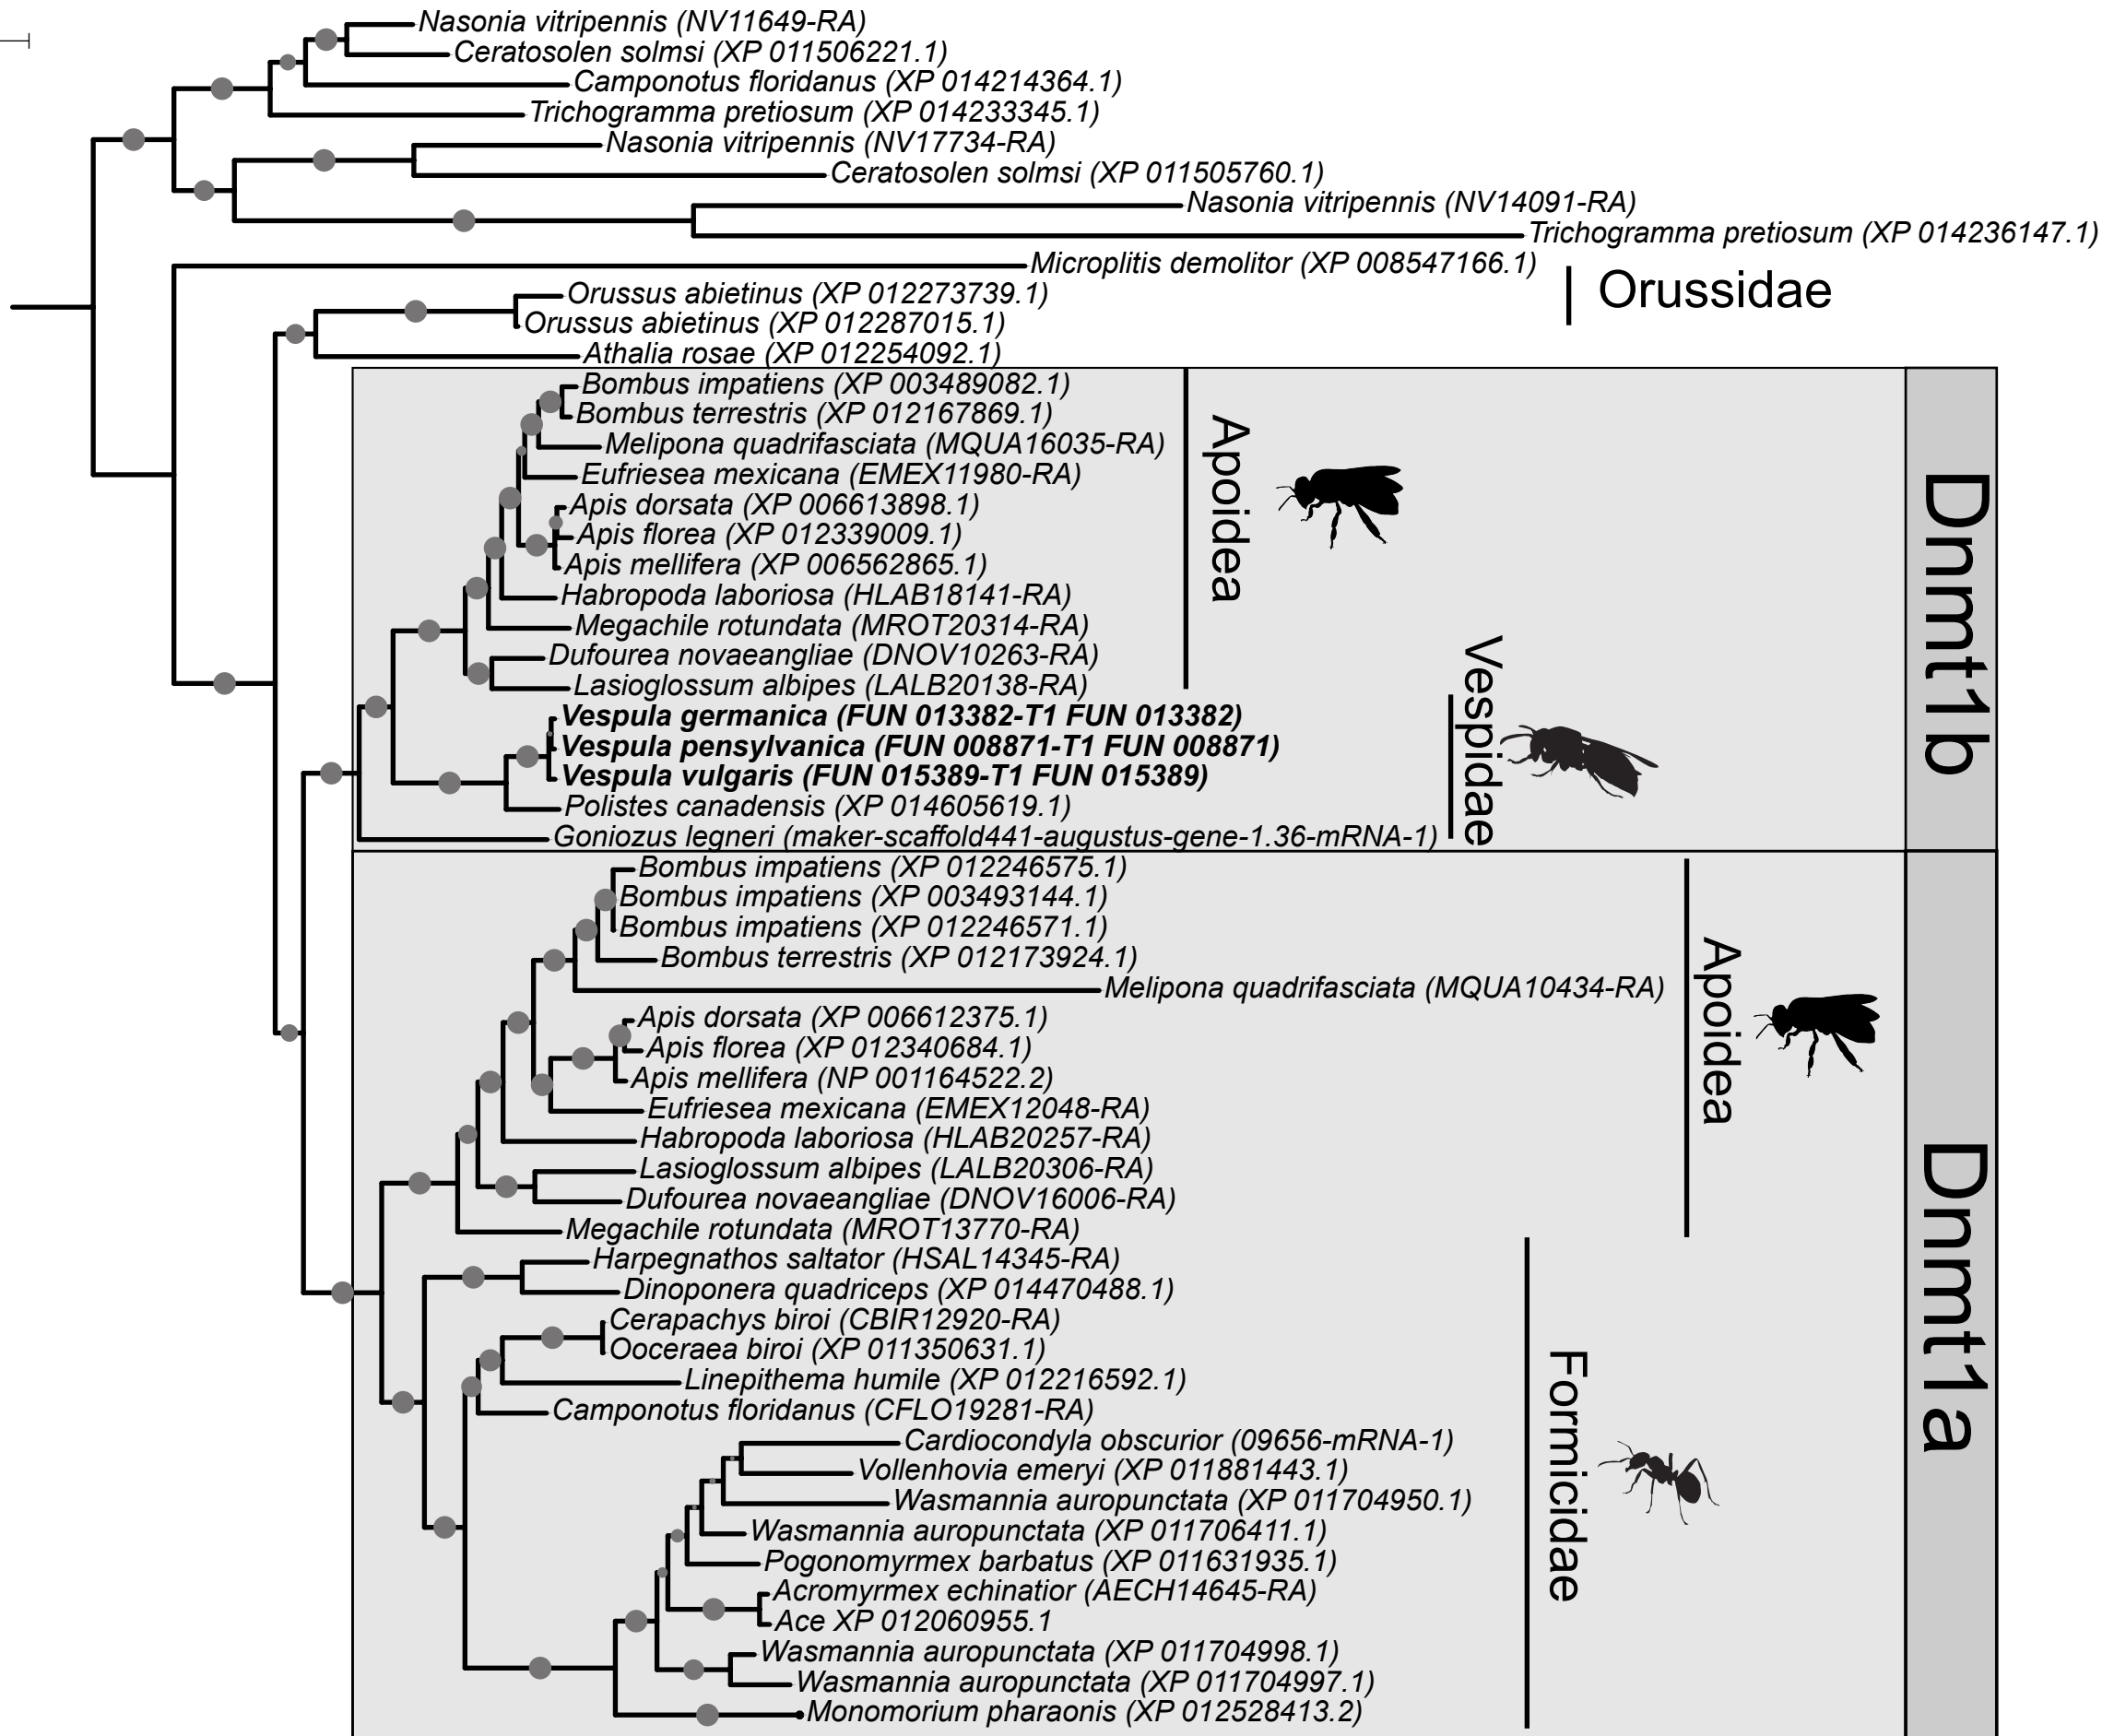

Supplement: Supplementary file 5 [file 1]

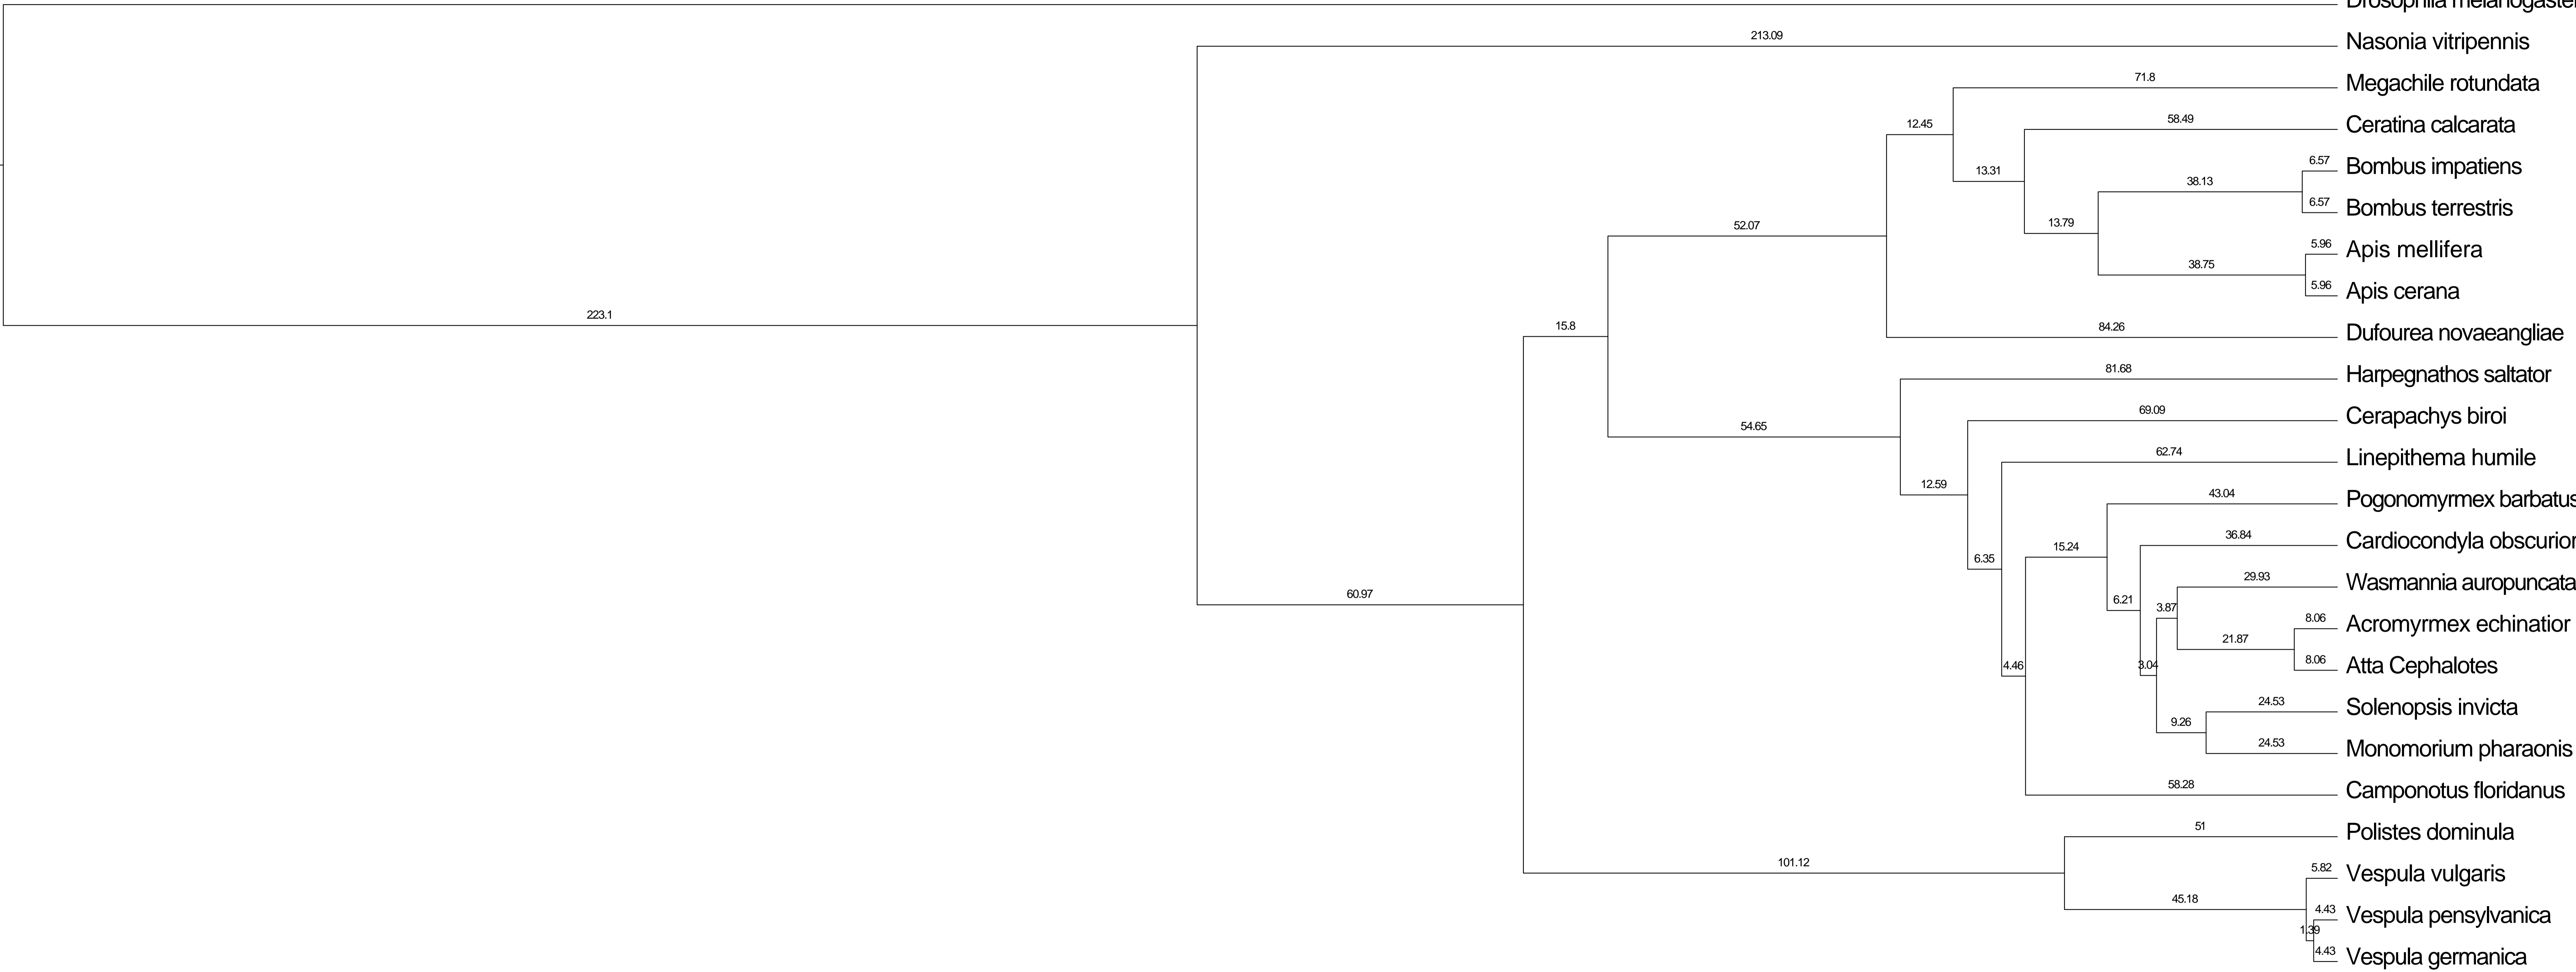

Supplement: Supplementary file 7 [file 1]

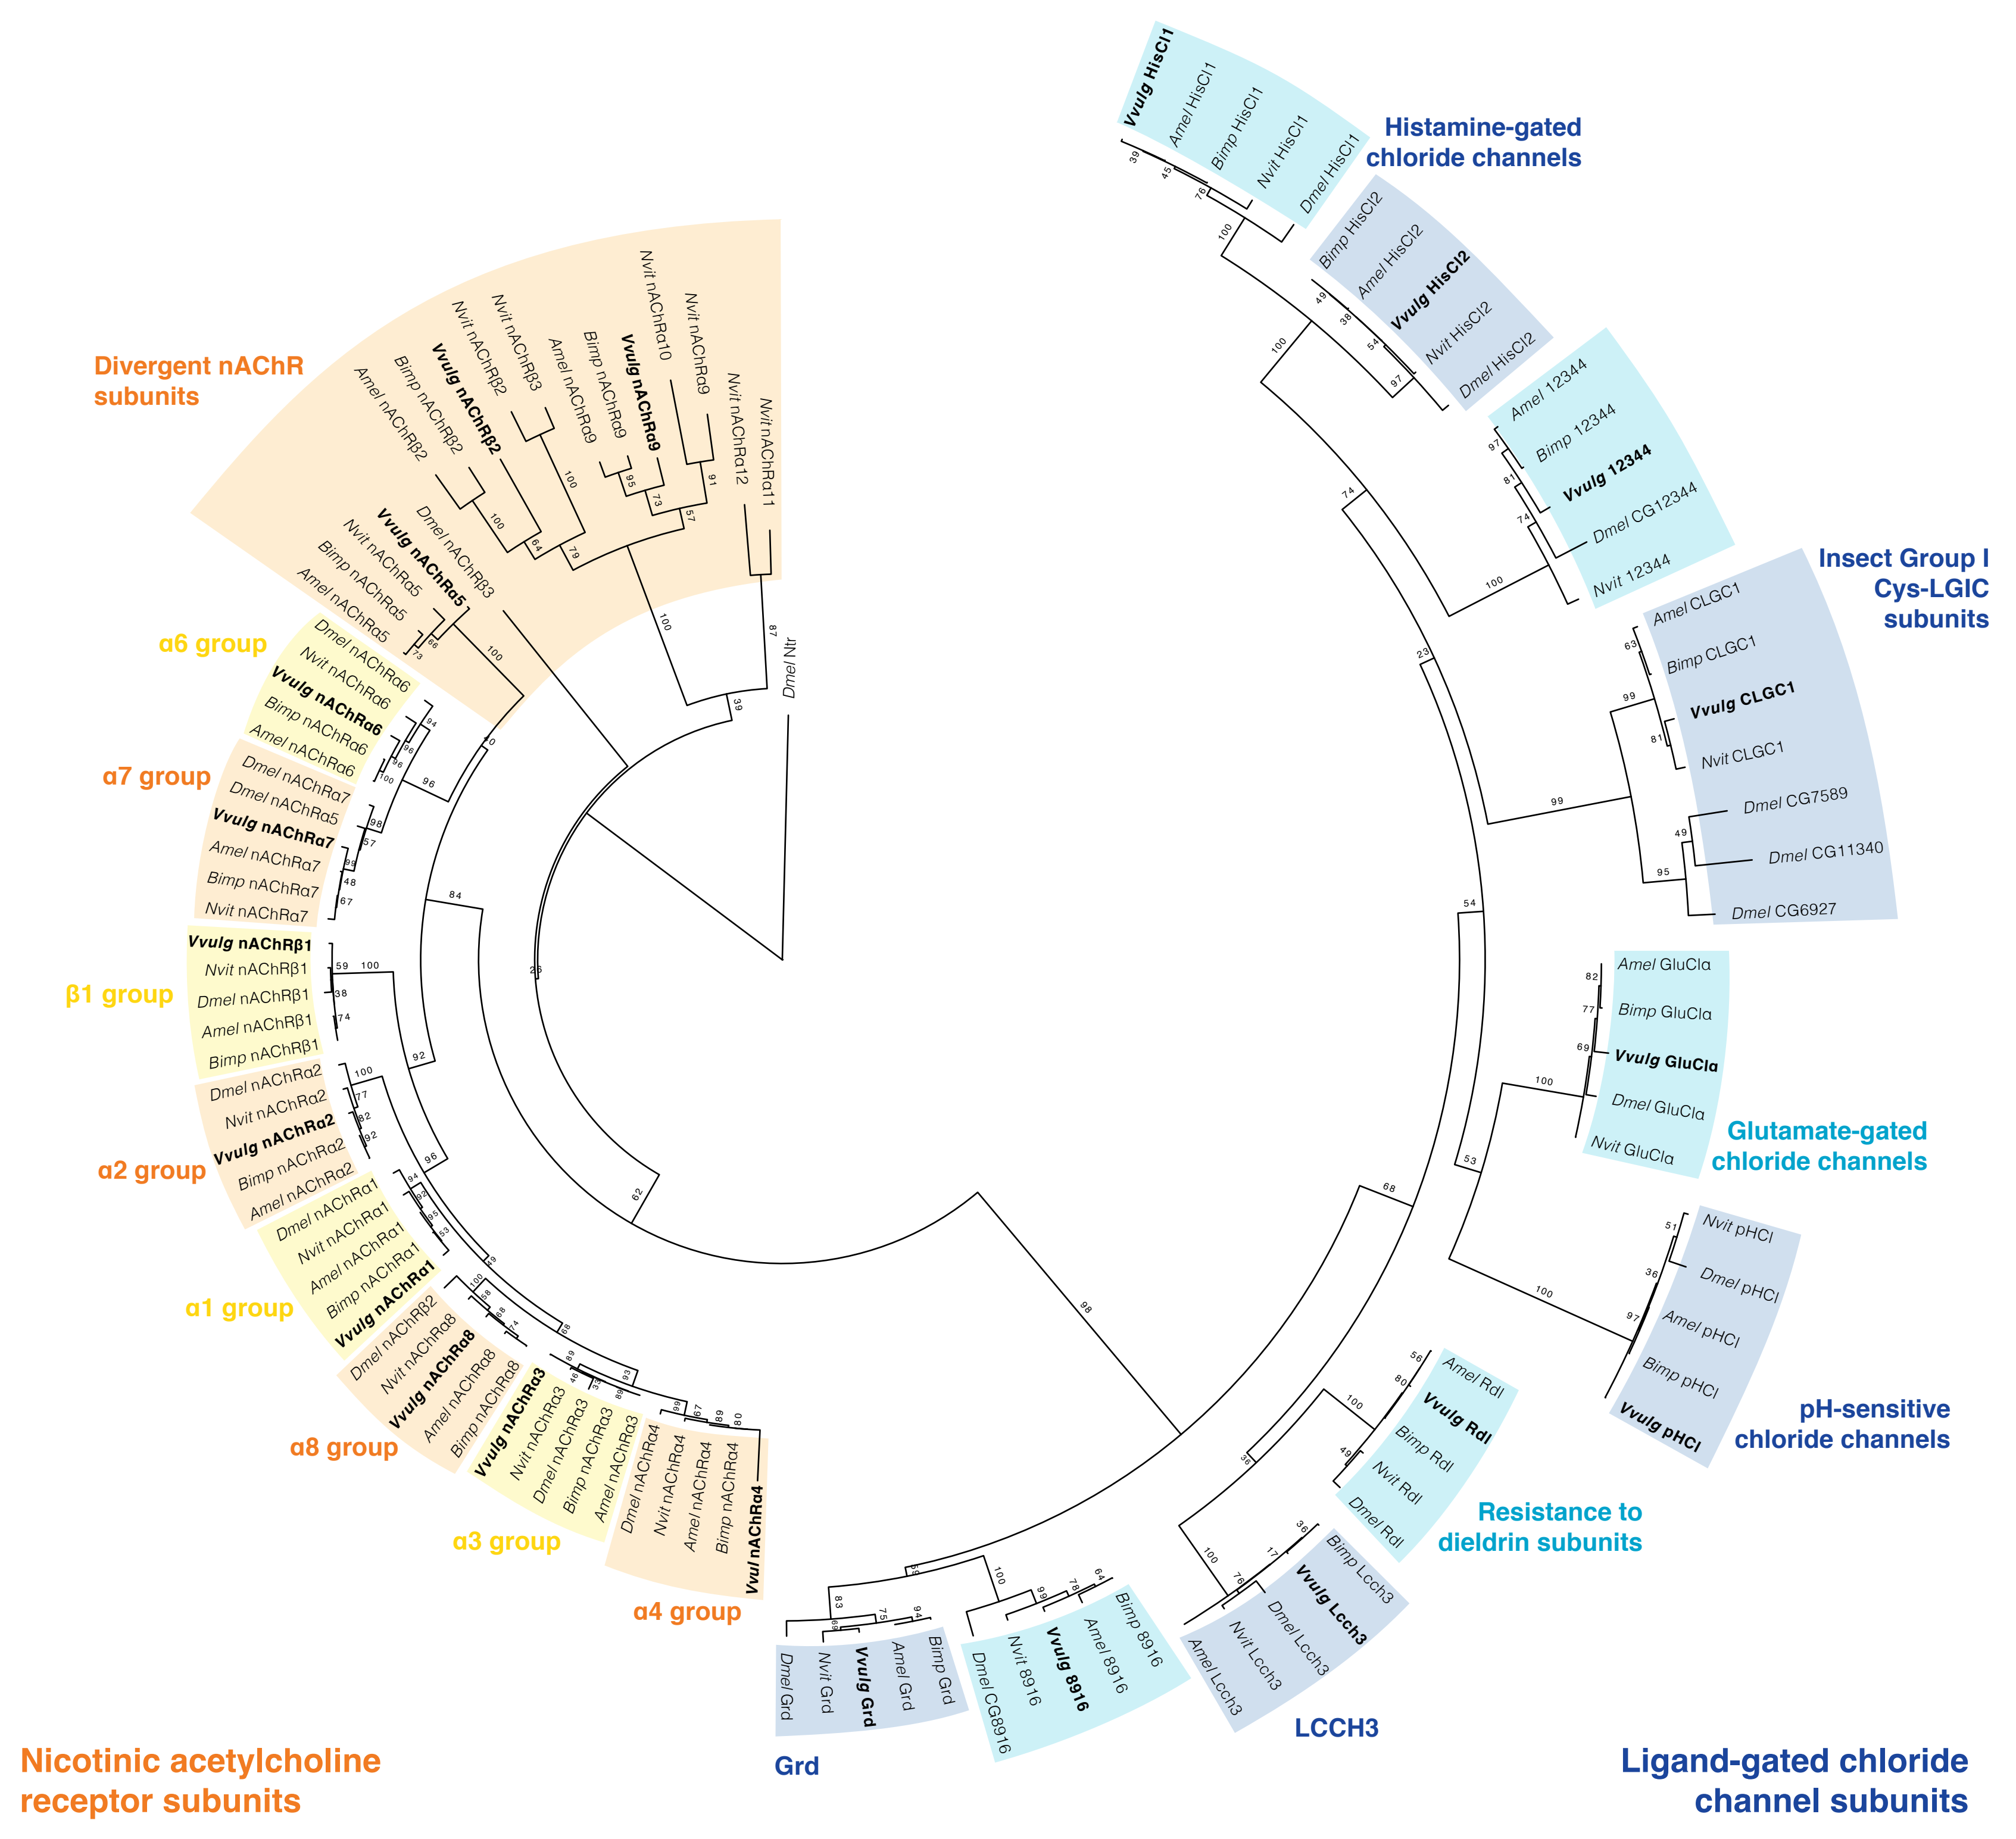

Supplement: Supplementary file 8 [file 1]
